# Supplementary material
Source: PubMed Central journal article supplement (PMC7586910)
Supplement: PRO-29-2201-s001.pdf [file PRO-29-2201-s001.pdf]

Supplementary Information for:

**Symmetry Breaking and Structural Polymorphism in a Bacterial  
Microcompartment Shell Protein for Choline Utilization**

Jessica M. Ochoa, Vy N. Nguyen, Mengxiao Nie, Michael R. Sawaya, Thomas A. Bobik and Todd  
O. Yeates

Contents:

Two supplementary figures

Two supplementary tables

One Supplementary Citation

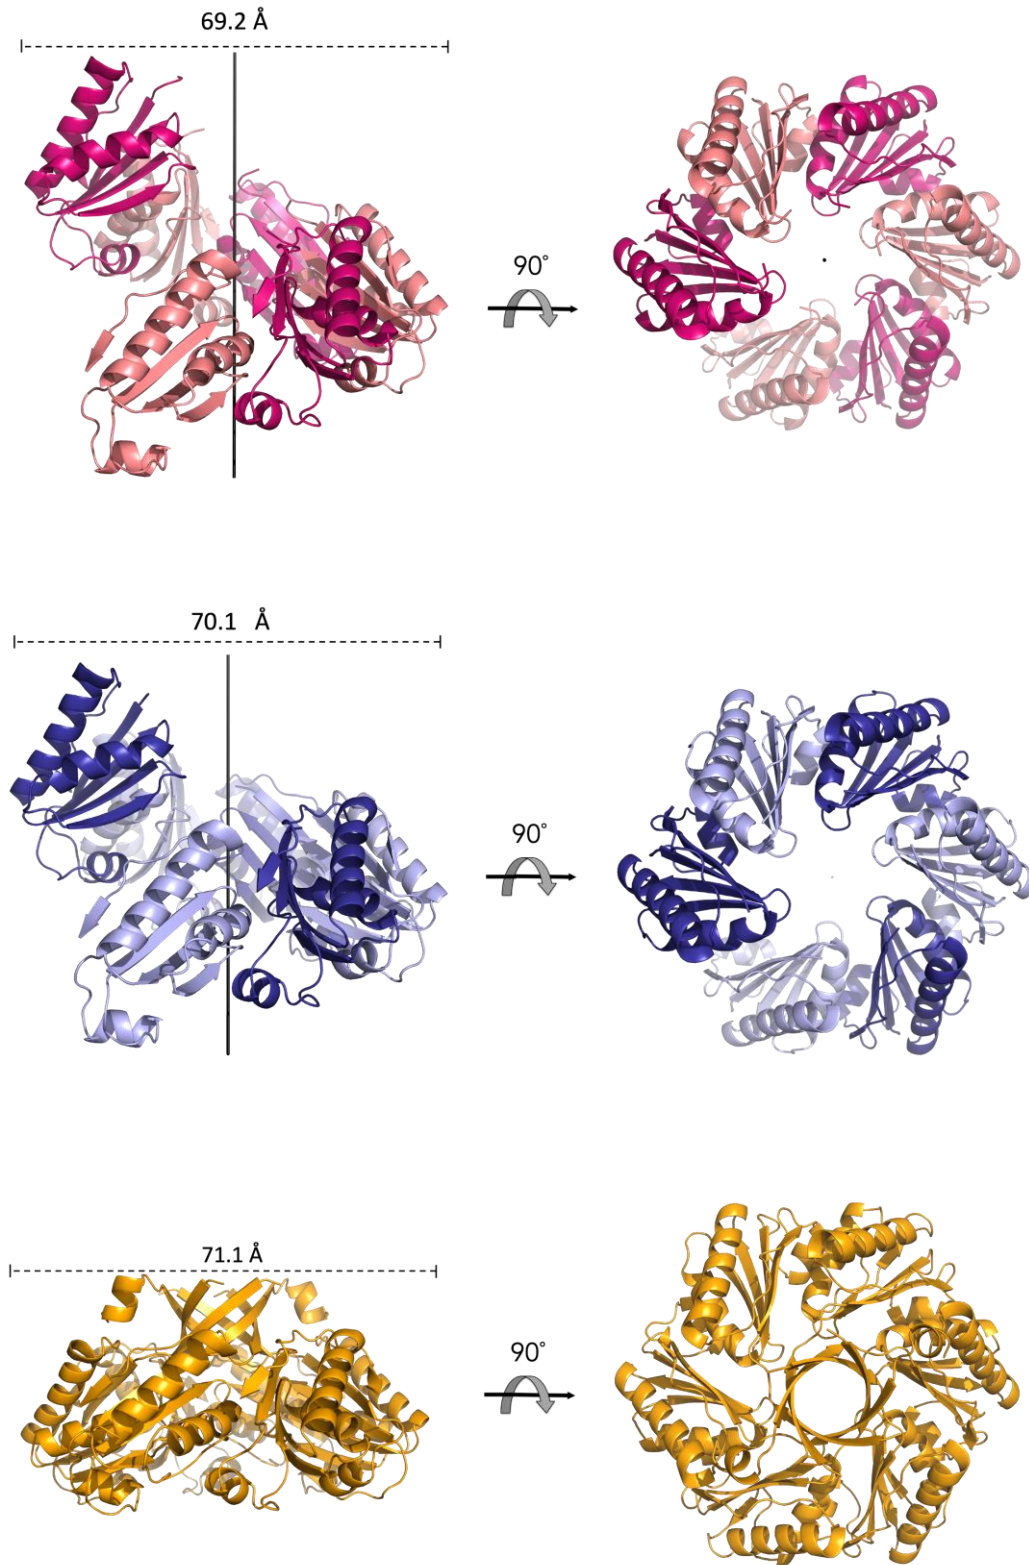

**Supplementary Figure 1.** Comparison of the screw and flat polymorphs of CutR. When looking down the six-fold axis of symmetry of Screw 1 (magenta) and Screw 2 (purple), CutR forms a similar architecture to the traditional flat hexamer (orange), possessing similar diameters.

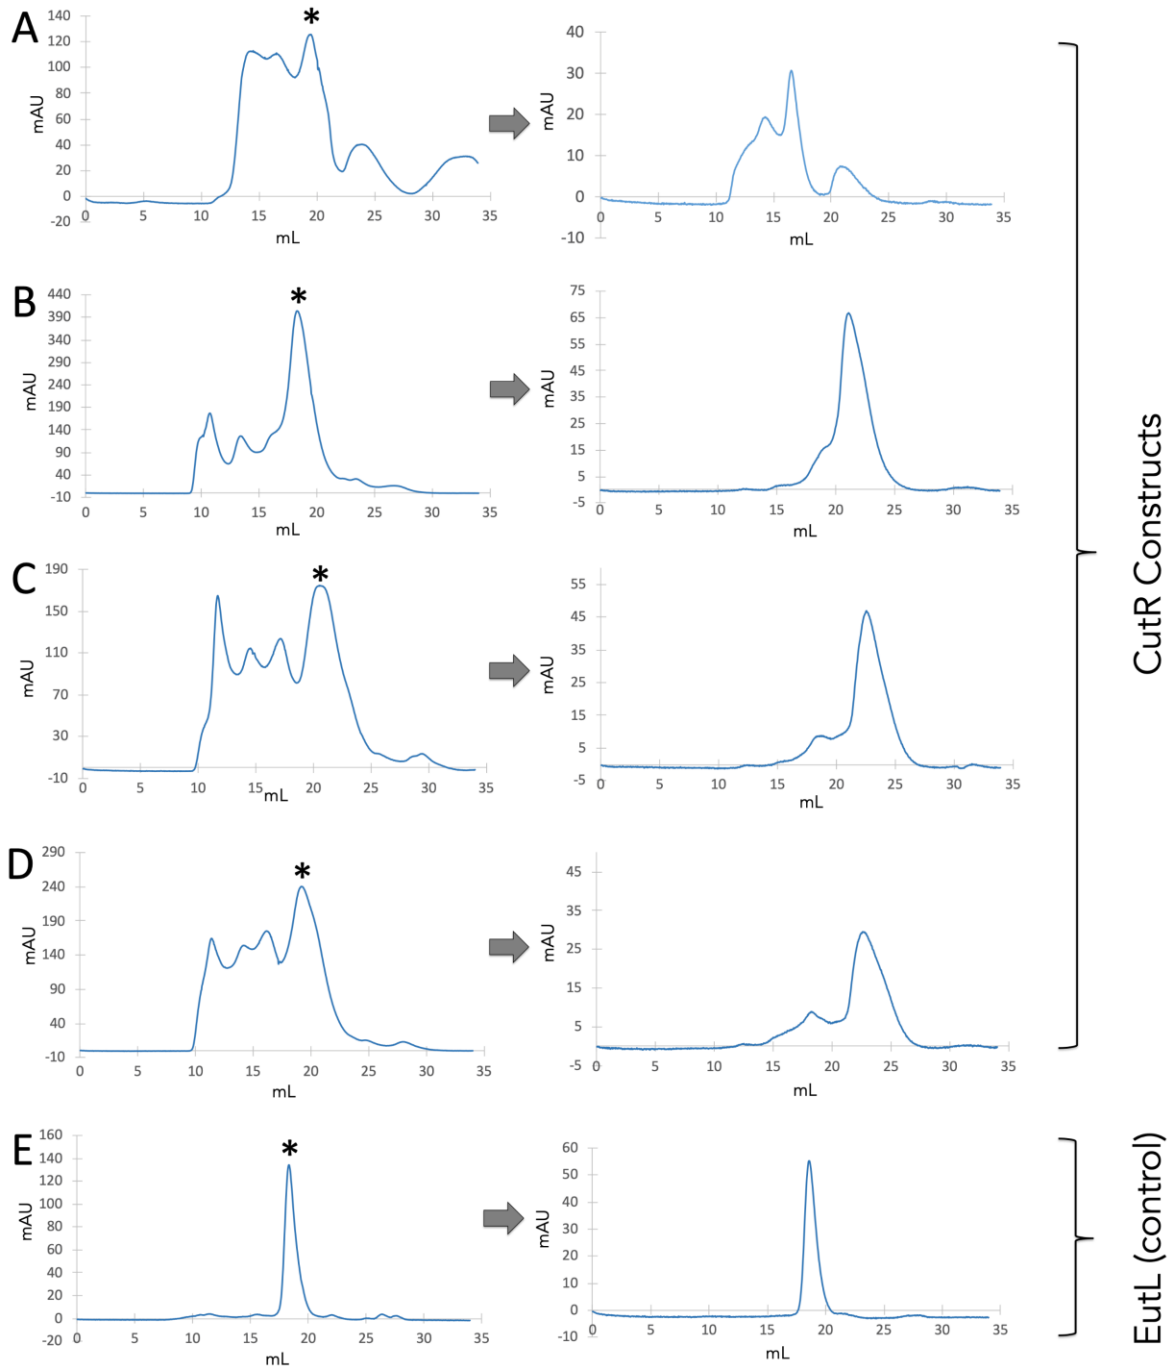

**Supplementary Figure 2.** Size exclusion profiles and recursive runs for the CutR polymorphs and EutL, a natural tandem BMC-domain construct used as a control. After initial size exclusion chromatography (SEC) (left panels), hexameric peaks (denoted by an asterisk) of CutR\_K66D (A), CutR\_K66A (B), CutR\_C37A (C), CutR\_TEV (D) and for EutL (E) were concentrated and subject to an additional round of SEC. SEC profiles of those asterisk-denoted peaks are shown in the corresponding right panels.

**Supplementary Table 1. CutR and polymorph sequences**

|                      |                                                                                |     |
|----------------------|--------------------------------------------------------------------------------|-----|
| CutR                 | -----MIEELGKIDRIIQESVPGKQITLAHVIAAPIEAVYECLGVDHEGAIGVVS LTP                    | 53  |
| Hexamer2 (CutR_TEV)  | ----- <b>G</b> MIEELGKIDRIIQESVPGKQITLAHVIAAPIEAVYECLGVDHEGAIGVVS LTP          | 54  |
| Hexamer1 (CutR_C37A) | <b>MHHHHHH</b> MIEELGKIDRIIQESVPGKQITLAHVIAAPIEAVYE <b>A</b> LGVDHEGAIGVVS LTP | 60  |
| Dimer (CutR_K66D)    | <b>MHHHHHH</b> MIEELGKIDRIIQESVPGKQITLAHVIAAPIEAVYECLGVDHEGAIGVVS LTP          | 60  |
| Screw1 (CutR_K66D)   | <b>MHHHHHH</b> MIEELGKIDRIIQESVPGKQITLAHVIAAPIEAVYECLGVDHEGAIGVVS LTP          | 60  |
| Screw2 (CutR_K66A)   | <b>MHHHHHH</b> MIEELGKIDRIIQESVPGKQITLAHVIAAPIEAVYECLGVDHEGAIGVVS LTP          | 60  |
|                      | ***** . *****                                                                  |     |
| CutR                 | NETAIIAADIAGKAANIDICFVDRFTGSVMFSGDIQSVETSLEDILEYFKNSLGFSTVPL                   | 113 |
| Hexamer2 (CutR_TEV)  | NETAIIAADIAG <b>AA</b> ANIDICFVDRFTGSVMFSGDIQSVETSLEDILEYFKNSLGFSTVPL          | 114 |
| Hexamer1 (CutR_C37A) | NETAIIAADIAG <b>AA</b> ANIDICFVDRFTGSVMFSGDIQSVETSLEDILEYFKNSLGFSTVPL          | 120 |
| Dimer (CutR_K66D)    | NETAIIAADIAG <b>DA</b> ANIDICFVDRFTGSVMFSGDIQSVETSLEDILEYFKNSLGFSTVPL          | 120 |
| Screw1 (CutR_K66D)   | NETAIIAADIAG <b>DA</b> ANIDICFVDRFTGSVMFSGDIQSVETSLEDILEYFKNSLGFSTVPL          | 120 |
| Screw2 (CutR_K66A)   | NETAIIAADIAG <b>AA</b> ANIDICFVDRFTGSVMFSGDIQSVETSLEDILEYFKNSLGFSTVPL          | 120 |
|                      | ***** *****                                                                    |     |
| CutR                 | TKS 116                                                                        |     |
| Hexamer2 (CutR_TEV)  | TKS 117                                                                        |     |
| Hexamer1 (CutR_C37A) | TKS 123                                                                        |     |
| Dimer (CutR_K66D)    | TKS 123                                                                        |     |
| Screw1 (CutR_K66D)   | TKS 123                                                                        |     |
| Screw2 (CutR_K66A)   | TKS 123                                                                        |     |
|                      | ***                                                                            |     |

**Supplementary Table 2.** X-ray Diffraction and Atomic Refinement Statistics

| PDB ID                                              | 6XPH                      | 6XPI                      | 6XPJ                             | 6XPK                      | 6XPL                      |
|-----------------------------------------------------|---------------------------|---------------------------|----------------------------------|---------------------------|---------------------------|
| Paper name                                          | Dimer                     | Hexamer 1                 | Hexamer 2                        | Screw 1                   | Screw 2                   |
| <b>Data collection</b>                              |                           |                           |                                  |                           |                           |
| Space group                                         | P4 <sub>3</sub> 2         | C2                        | P4 <sub>2</sub> 2 <sub>1</sub> 2 | P6 <sub>1</sub>           | P6 <sub>1</sub>           |
| Cell dimensions                                     |                           |                           |                                  |                           |                           |
| <i>a</i> , <i>b</i> , <i>c</i> (Å)                  | 109.66, 109.66, 109.66    | 135.36, 76.14, 67.81      | 79.29, 79.29, 100.79             | 61.83, 61.83, 41.93       | 64.91, 64.91, 33.78       |
| $\alpha$ , $\beta$ , $\gamma$ (°)                   | 90.00, 90.00, 90.00       | 90.00, 119.71, 90.00      | 90.00, 90.00, 90.00              | 90.00, 90.00, 120.00      | 90.00, 90.00, 120.00      |
| Resolution (Å)                                      | 77.54-1.80 (1.85-1.80)    | 63.91-2.60 (2.67-2.60)    | 62.32-1.50 (1.54-1.50)           | 53.55-2.80 (2.87-2.80)    | 56.21-3.30 (3.50-3.30)    |
| <i>R</i> <sub>merge</sub>                           | 0.079 (1.39)              | 0.073 (1.44)              | 0.059 (0.855)                    | 0.113 (0.954)             | 0.234 (1.34)              |
| <i>I</i> / $\sigma$ ( <i>I</i> )                    | 49.24 (4.71)              | 10.31 (1.04)              | 23.7 (3.08)                      | 15.46 (2.22)              | 4.63 (0.98)               |
| CC <sub>1/2</sub>                                   | 100.0 (94.9)              | 99.9 (74.7)               | 99.9 (86.0)                      | 99.9 (72.2)               | 99.2 (51.1)               |
| Completeness (%)                                    | 100.0 (100.0)             | 92.3 (83.1)               | 99.9 (99.3)                      | 99.4 (95.8)               | 99.3 (99.5)               |
| Redundancy                                          | 75.7 (75.2)               | 4.02 (4.14)               | 13.0 (12.7)                      | 9.51 (9.38)               | 4.68 (4.54)               |
| <b>Refinement</b>                                   |                           |                           |                                  |                           |                           |
| Resolution (Å)                                      | 1.80                      | 2.60                      | 1.50                             | 2.80                      | 3.30                      |
| No. reflections                                     | 19336 (1386)              | 17276 (311)               | 46821 (3373)                     | 2074 (145)                | 1129 (79)                 |
| <i>R</i> <sub>work</sub> / <i>R</i> <sub>free</sub> | 0.176/0.210 (0.237/0.273) | 0.201/0.242 (0.286/0.492) | 0.161/0.184 (0.207/0.245)        | 0.231/0.267 (0.293/0.284) | 0.219/0.265 (0.334/0.296) |
| Molecules per asymmetric unit                       | 2                         | 6                         | 3                                | 1                         | 1                         |
| No. atoms                                           |                           |                           |                                  |                           |                           |
| Protein                                             | 1506                      | 4808                      | 2536                             | 734                       | 720                       |
| Ligand/ion                                          | 21                        | 0                         | 20                               | 0                         | 0                         |
| Water                                               | 128                       | 0                         | 201                              | 2                         | 0                         |
| <i>B</i> -factors                                   |                           |                           |                                  |                           |                           |
| Protein                                             | 35.9                      | 105.5                     | 21.8                             | 67.4                      | 134.5                     |
| Ligand/ion                                          | 56.1                      | -                         | 58.0                             | -                         | -                         |
| Water                                               | 41.5                      | -                         | 29.8                             | 77.5                      | -                         |
| R.m.s. deviations                                   |                           |                           |                                  |                           |                           |
| Bond lengths (Å)                                    | 0.014                     | 0.008                     | 0.010                            | 0.002                     | 0.005                     |
| Bond angles (°)                                     | 1.8                       | 1.1                       | 1.6                              | 1.2                       | 1.3                       |
| Ramachandran statistics (%)                         |                           |                           |                                  |                           |                           |
| Most favorable                                      | 100                       | 98.3                      | 99.7                             | 93.9                      | 96.9                      |
| Allowed                                             | 0                         | 1.4                       | 0.3                              | 6.1                       | 3.1                       |
| Outliers                                            | 0                         | 0.3                       | 0                                | 0                         | 0                         |

Data for each structure were collected from a single crystal. \*Values in parentheses are for the highest-resolution shell.

### Supplementary citation

S1. Sievers F, Higgins DG (2014) Clustal Omega. Current Protocols in Bioinformatics 48:3.13.1-3.13.16.
